# Supplementary material for: A Step Forward in Breast Cancer Research: From a Natural-Like Experimental Model to a Preliminary Photothermal Approach
Source: MDPI journal article supplement (doi:10.3390/ijms21249681), 2020-12-18
Supplement: s1 [file s1]

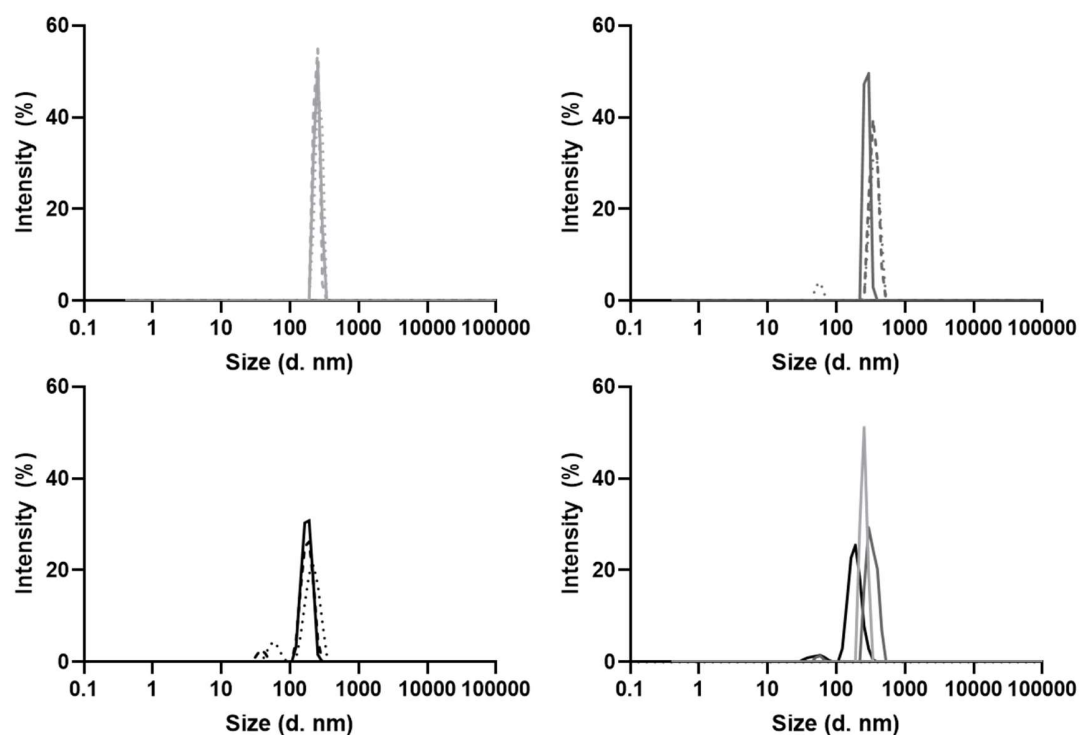

**Figure S1:** GNPs' size distribution by intensity (%) obtained by DLS. Three curves (full, dotted and dashed), each one of them corresponding to individual measures, are shown for each type of GNPs: Core GNPs (light grey), HAOA-coated GNPs (dark grey) and EGF-conjugated GNPs (black). Additionally, it is represented (bottom right corner) the average curve of each sample for comparison of the GNPs' types.
